# Supplementary material
Source: PubMed Central journal article supplement (PMC2475599)
Supplement: NIHMS40033-supplement-supplement.pdf [file NIHMS40033-supplement-supplement.pdf]

# Intronic microRNA precursors that bypass Drosha processing

J. Graham Ruby\*, Calvin H. Jan\*, David P. Bartel

\*these authors contributed equally to this work

|                                                                                                                                            |         |
|--------------------------------------------------------------------------------------------------------------------------------------------|---------|
| Figure S1 – Mirtrons accumulate as lariats after splicing and require debranching enzyme (Ldbr) for conversion into functional pre-miRNAs. | Page 2  |
| Figure S2 – Confirmation of RNAi knockdowns.                                                                                               | Page 3  |
| Table S1 – Mirtrons of <i>Drosophila melanogaster</i> .                                                                                    | Page 4  |
| Table S2 – Mirtrons of <i>Caenorhabditis elegans</i> .                                                                                     | Page 11 |
| Table S3 – Quantification of signals from RNA blots of Figure 2c and 2d.                                                                   | Page 12 |
| Table S4 – DNA construct sequences.                                                                                                        | Page 13 |

**a**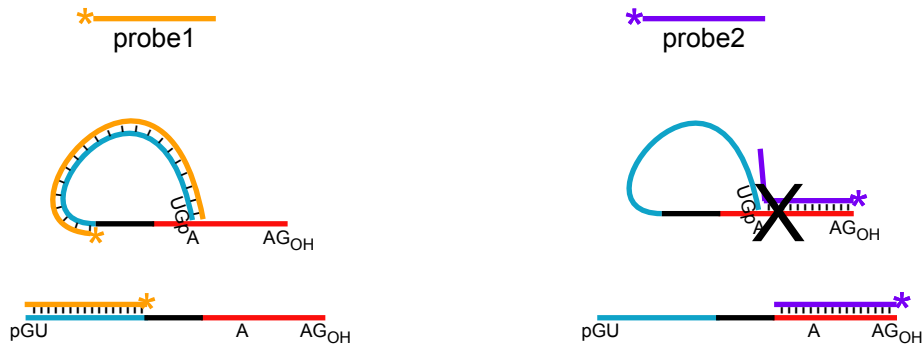**b**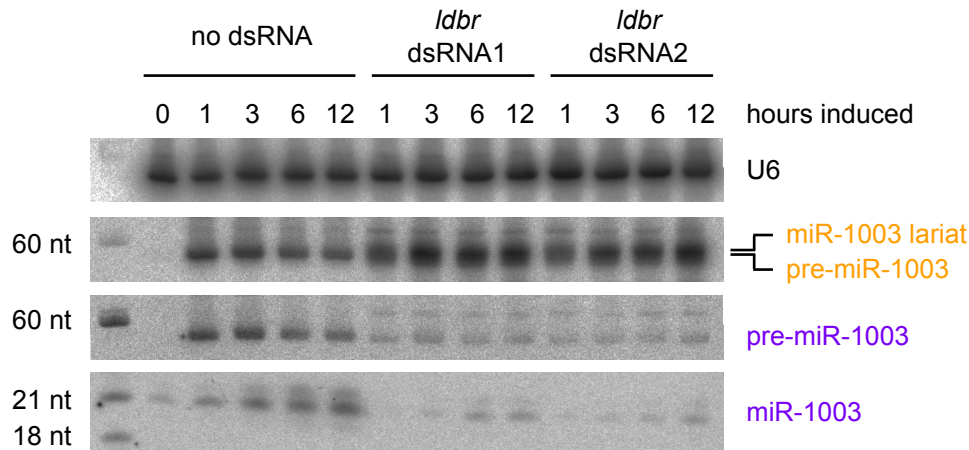

**Figure S1. Mirtrons accumulate as lariats after splicing and require debranching enzyme (Ldbr) for conversion into functional pre-miRNAs.** **a**, Left, hybridization of probe1 to miR-1003 intron lariat or linear pre-miR-1003. Right, stable hybridization of probe2 occurs only with linear pre-miR-1003, and is inhibited by the presence of the branch-point adenosine in the lariat. **b**, Northern blotting was used to analyze miR-1003 maturation in a time course after induction of mini-gene expression. Prior to induction, cells were soaked with either of two dsRNAs targeting *lbr* (CG7942) or left untreated. RNA was resolved on a denaturing 15% acrylamide gel. Under these conditions, the lariat runs slightly above the pre-miRNA hairpin. In DBR dsRNA lanes, the major band detected by probe1 is absent when the blot is hybridized to probe2, indicating the presence of a lariat in these samples. When separated on a 17% gel, the lariat runs significantly higher (Fig. 2c). Changes in relative mobility in gels with different polyacrylamide densities are characteristic of non-linear RNA species.

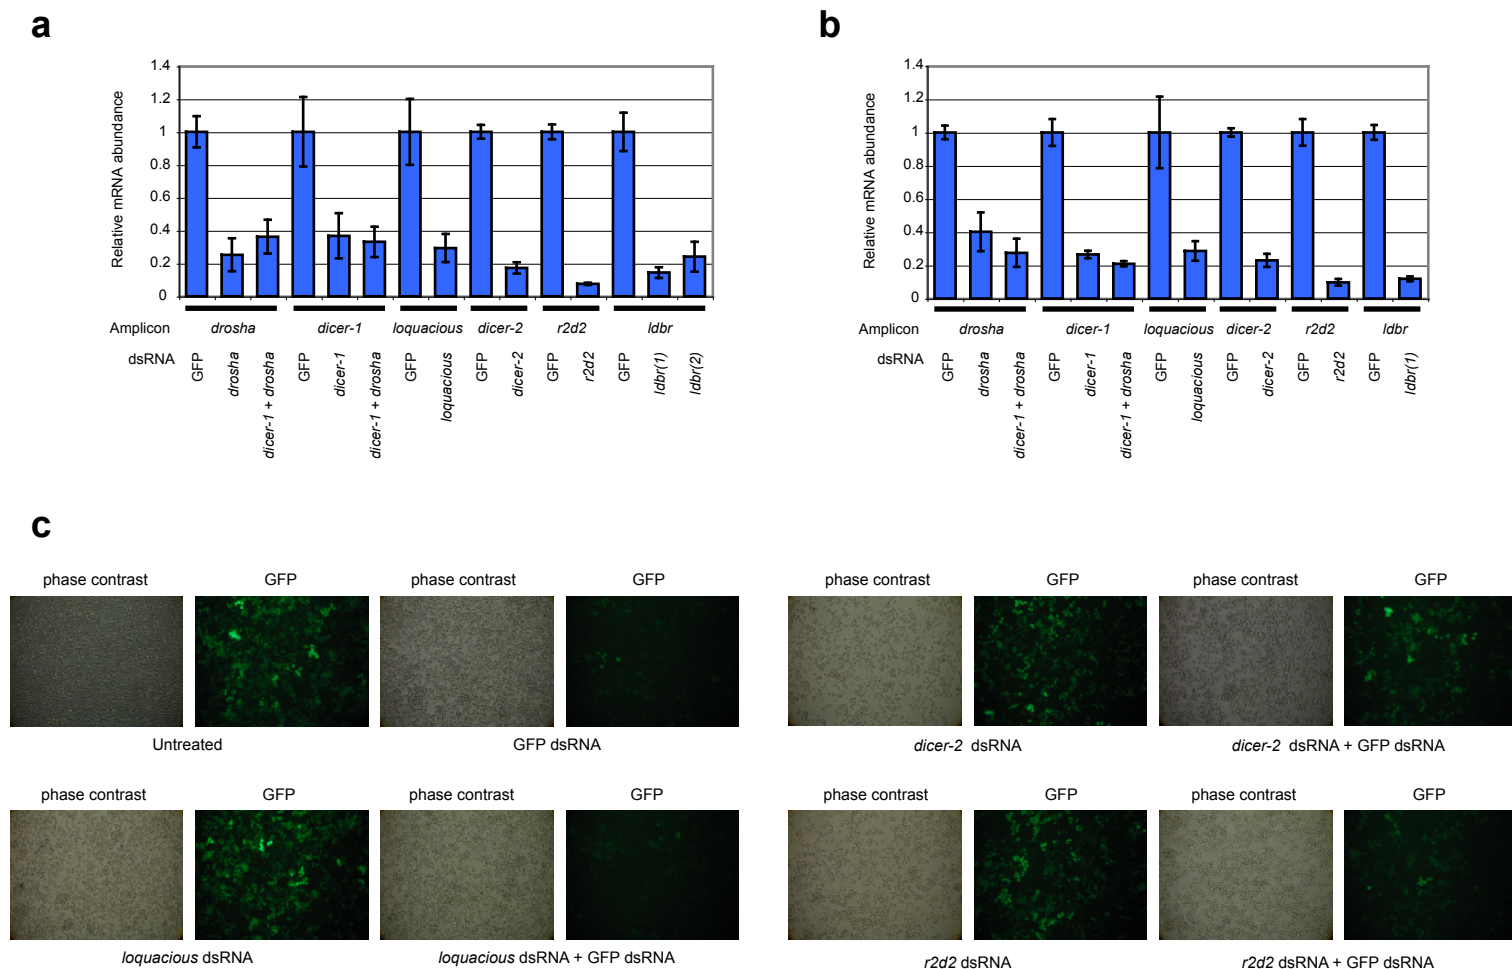

**Figure S2. Confirmation of RNAi knockdowns.** **a**, Quantitative RT-PCR analysis of samples from Fig. 2c. Relative abundance was measured using the  $\Delta\Delta C_t$  method, normalizing to *actin 5c* ( $\Delta C_t$ ), and then to samples soaked in GFP dsRNA ( $\Delta\Delta C_t$ ). Values are reported as geometric mean  $\pm$  s.d. (n=3). **b**, Analysis as in (a), using samples from Fig. 2d. **c**, Functional analysis of *dicer-2* and *r2d2* knockdown by fluorescence microscopy. Cells stably expressing GFP were soaked in dsRNAs targeting *loquacious*, *dicer-2*, or *r2d2*. After 4 days, dsRNA targeting GFP was added. Depletion of Dicer-2 or R2D2 reduces the ability of GFP dsRNA to silence GFP. Depletion of Loquacious serves as a negative control. Functional efficacy of the other dsRNAs was assessed by northern blot analysis of miRNA or intron processing (Fig. 2).







Table S1

**mir-1009**

**# reads:** 14  
**Most abundant read:** UCUCAAAAUUGUUACAUUUCAG  
**Host gene:** CG3860-RA  
**Intron coordinates:** chr2R:19500653-19500714(-)

|                                                                                                                                | <u># reads</u> | <u># loci</u> |
|--------------------------------------------------------------------------------------------------------------------------------|----------------|---------------|
| GUAAGUGUAAGACUUUCUUGAGUUACCCGCGAUGAGUAUCUCAAAAAUUGUUACAUUUCAG<br>(.(((((((.(.(((.((((.((((.(.....).)))..)))))))).).))))))))).. |                |               |
| .UAAGUGUAAGACUUUCUUGAGU.....                                                                                                   | 1              | 1             |
| .....UCUCAAAAUUGUUACAUUUCAG.                                                                                                   | 3              | 1             |
| .....UCUCAAAAUUGUUACAUUUCAG                                                                                                    | 10             | 1             |
| <i>D. melanogaster</i> GTAAGTGTAAAGACTTTCT-----TGAGTT---ACCCGCGATGAGTATCTCAAAAATTGT--TACATTTTCAG                               |                |               |
| <i>D. simulans</i> GTAAGTGTAAAGACTTTCT-----TGAGTT---ACCCGCGATGAGTATCTCAAAAATTGT--TACATTTTCAG                                   |                |               |
| <i>D. yakuba</i> GTAAGTGTAAAGACTTTCT-----TGAGTT---ACCCGCGAGGAGTATCTCAAAAATTAT--TACATTTTCAG                                     |                |               |
| <i>D. ananassae</i> GTAAGTTTGAATACTTC-----TACTCT---ATCTTGA-ATGTCTCTCAATGTC--CATCTTCTAG                                         |                |               |
| <i>D. pseudoobscura</i> GTAAGTTCGAGATCCAAACACATAAGTT---CTTTTTTA-----ACATCCAAA-----TATTTTGTAG                                   |                |               |
| <i>D. mojavensis</i> GTAAGGACCAA--TTGG-----TAAAGTGAGAAATTGGAAGAAATTATTGAAATTATCTCGTGTTAG                                       |                |               |

**mir-1010**

**# reads:** 193  
**Most abundant read:** UUUCACCUAUCGUUCCAUUUGCAG  
**Host gene:** CG31163-RA CG31163-RB CG31163-RC  
**Intron coordinates:** chr3R:18118600-18118671(+)

|                                                                                                                                            | <u># reads</u> | <u># loci</u> |
|--------------------------------------------------------------------------------------------------------------------------------------------|----------------|---------------|
| GUAAGUGGUGUAGAUGAAACAAUUUACCAACAAUUUUGUUGAUUUUACCUAUCGUUCCAUUUGCAG<br>((((((((((.(((.((((.((((.(.....(((.....)))))))).)))))))).))))))))).. |                |               |
| GUAAGUGGUGUAGAUGA.....                                                                                                                     | 1              | 1             |
| GUAAGUGGUGUAGAUGAAA.....                                                                                                                   | 2              | 1             |
| GUAAGUGGUGUAGAUGAAAC.....                                                                                                                  | 3              | 1             |
| GUAAGUGGUGUAGAUGAAACA.....                                                                                                                 | 30             | 1             |
| GUAAGUGGUGUAGAUGAAACAA.....                                                                                                                | 1              | 1             |
| .....UUUCACCUAUCGUUCCAUUUG.....                                                                                                            | 10             | 1             |
| .....UUUCACCUAUCGUUCCAUUUGC.....                                                                                                           | 39             | 1             |
| .....UUUCACCUAUCGUUCCAUUUGCA.....                                                                                                          | 38             | 1             |
| .....UUUCACCUAUCGUUCCAUUUGCAG.....                                                                                                         | 64             | 1             |
| .....UUUCACCUAUCGUUCCAUUUGC.....                                                                                                           | 3              | 1             |
| .....UUUCACCUAUCGUUCCAUUUGCA.....                                                                                                          | 1              | 1             |
| .....UUUCACCUAUCGUUCCAUUUGCAG.....                                                                                                         | 1              | 1             |
| <i>D. melanogaster</i> GTAAGTGGTGTAGATGAAACAAATTTACCAAC-AAT---TTTGTGGATTGTTTCACCTATCGTTCCATTTGCAG                                          |                |               |
| <i>D. simulans</i> GTAAGTGGTGTAGATGAAACAAATTTACCAAC-AATA-TTTTGTGGATTGTTTCACCTATCGTTCCATTTGCAG                                              |                |               |
| <i>D. yakuba</i> GTAAGTGGTGTAGATGAAACAAATTTACCAAC-AATATTTTGTGGATTGTTTCACCTATCGTTCCATTTGCAG                                                 |                |               |
| <i>D. ananassae</i> GTAAGTGGTGTAGATGAAACAAATTTACCAAC-AATA-TTTTGTGGATTGTTTCACCTATCGTTCCATTTGCAG                                             |                |               |
| <i>D. pseudoobscura</i> GTAAGTGGTGTAGATGAAACAAATTTACCAAC-CTTT-ATTGTGGATTGTTTCACCTATCGTTCCATTTGCAG                                          |                |               |
| <i>D. virilis</i> GTAAGTGGTGTAGATGAAACAAATTTACCAACAAAT--TTTGTGGATTGTTTCACCTATCGTTCCATTTGCAG                                                |                |               |
| <i>D. mojavensis</i> GTAAGTGGTGTAGATGAAACAAATTTACCAAC-AAT--TTTGTGGATTGTTTCACCTATCGTTCCATTTGCAG                                             |                |               |

Table S1

**mir-1011**

**# reads:** 2  
**Most abundant read:** UUAUUGGUUCAAAUCGCUCGCAG  
**Host gene:** CG17274-RA CG17274-RB  
**Intron coordinates:** chr3R:16679026-16679080(-)

|                                                                                                                                                                     | <u># reads</u> | <u># loci</u> |
|---------------------------------------------------------------------------------------------------------------------------------------------------------------------|----------------|---------------|
| GUGAGUUUUUGAGCCAGGAAUUAUUGUUCUUAUUUUGGUUCAAAUCGCUCGCAG<br>((((((.( ((((((((((.( ((((. . . . .))))))))) .)))))) .)))) . . . . .<br>. . . . . UUAUUGGUUCAAAUCGCUCGCAG | 2              | 1             |

|                         |                                                                           |
|-------------------------|---------------------------------------------------------------------------|
| <i>D. melanogaster</i>  | GTGAGTTTTTGAGCCAGG----AATATAGTT-----CTTAT----TAT-TGGTTCAAATCGCTCGCAG      |
| <i>D. simulans</i>      | GTGAGTTTTTGAGCCAGG----AATATAGTT-----CTTAT----TAT-TGGTTCAAATCGCTCGCAG      |
| <i>D. yakuba</i>        | GTGAGTTTTTGAGCCAGG----AATATAATT-----CTTAT----TAT-TGGTTCAAATCGCTCGCAG      |
| <i>D. ananassae</i>     | GTGAGTCTTTGAACCAGG----AATATAATT-----TGAT----ATAT-TGGTTCAAATCGCTCGTAG      |
| <i>D. pseudoobscura</i> | GTGAGATTTTGAATCTAATATATAATATAATC-----CGTACGTGTATATATGGTTCAAATTA CTCTG TAG |
| <i>D. virilis</i>       | GTGAGTCATTGAACCAGG----AATATA TGTATGTAATTCTTAT----ATAT-TGGTTCAAATTTCTCGCAG |
| <i>D. mojavensis</i>    | GTGAGTCTTTGAGCCAGG----AATATA TGTTCAT----CTTAT----TAT-TGGTTCAAATCTCTCGTAG  |

**mir-1012**

**# reads:** 101  
**Most abundant read:** UUAGUCAAAAGAUUUUCCCCAUAG  
**Host gene:** CG31072-RA CG31072-RB  
**Intron coordinates:** chr3R:22687070-22687129(-)

|                                                                                                                                                                                                                                                                                                                                                                                                                                                | <u># reads</u> | <u># loci</u> |
|------------------------------------------------------------------------------------------------------------------------------------------------------------------------------------------------------------------------------------------------------------------------------------------------------------------------------------------------------------------------------------------------------------------------------------------------|----------------|---------------|
| GUGGGUAGAACUUUGAUUAAUUAUUGCUUGAAAAUUAUUGUCAAAAGAUUUUCCCCAUAG<br>((((((.( ((((((((((.( ((((. . . . .))))))))) .)))))) .)))) . . . . .<br>GUGGGUAGAACUUUGAUUA . . . . . 1 1<br>GUGGGUAGAACUUUGAUUA . . . . . 5 1<br>GUGGGUAGAACUUUGAUUAU . . . . . 20 1<br>GUGGGUAGAACUUUGAUUAAUA . . . . . 16 1<br>GUGGGUAGAACUUUGAUUAAUAU . . . . . 1 1<br>. . . . . UUAGUCAAAAGAUUUUCCCCAU . . . . . 2 1<br>. . . . . UUAGUCAAAAGAUUUUCCCCAUAG . . . . . 56 1 | 101            | 1             |

|                         |                                                                                                   |
|-------------------------|---------------------------------------------------------------------------------------------------|
| <i>D. melanogaster</i>  | GTGGGTAGAACTTTGATTAAT-----ATTGCTTGAAAAAT-----ATTAGTCAA----AGATTTT-C-----CCCATAG                   |
| <i>D. simulans</i>      | GTGGGTAGAACTTTGATTAAT-----ATTGCTTGAGAA-T-----ATTAGTCAA----AGATTTT-C-----CCCATAG                   |
| <i>D. yakuba</i>        | GTGGGTAGAACTTTGATTAAT-----ATTGCTTGCAAGAT-----ATTAGTCAA----AGTTTTTC-----CCCATAG                    |
| <i>D. ananassae</i>     | GTAGGT-----TTCAACCAA-----TTCTCTTGAGAGT-----TCAGTTAACTTTATATATT-C-----TTTTTAG                      |
| <i>D. pseudoobscura</i> | GTGGGTAGT-CTCTCATATAT-----AGTTATAAAAGAA CGAACACCAGTGGTTAA-GCAATGCATT-T-----CTGTAG                 |
| <i>D. virilis</i>       | GT-----ACGATTGTTATTTA-----AATGCTTTATATAT-----TTATCTAT----AAGCTAT-CTTTTGTGTGCAG                    |
| <i>D. mojavensis</i>    | GTGTGTAAA-TATGATTATT-ATTTATAAATTATCGAAAACCTTAACCTCTAATGTTT-----TTATATTT----ATATTTT-CAACATACTCTCAG |



Table S1

**mir-1013**

**# reads:** 17  
**Most abundant read:** AUAAAAGUAUGCCGAACUCG  
**Host gene:** [CG12072-RA](#)  
**Intron coordinates:** [chr3R:26617357-26617418\(-\)](#)

|                                                                                                                                   | <u># reads</u> | <u># loci</u> |
|-----------------------------------------------------------------------------------------------------------------------------------|----------------|---------------|
| GUGAGUUUCGUACACUUAUUAUAGGAUCGGCCGUUAAUAAAAGUAUGCCGAACUCGCAG<br>((((((((((.....)))))))).))))))..<br>.....UAAUAGGAUCGGCCGUUAAU..... | 2              | 1             |
| .....AUAAAAGUAUGCCGAACUCG..                                                                                                       | 4              | 1             |
| .....AUAAAAGUAUGCCGAACUCGC..                                                                                                      | 4              | 1             |
| .....AUAAAAGUAUGCCGAACUCGCA.                                                                                                      | 2              | 1             |
| .....AUAAAAGUAUGCCGAACUCGCAG                                                                                                      | 4              | 1             |
| .....UAAAAGUAUGCCGAACUCGCAG                                                                                                       | 1              | 1             |
| <br>                                                                                                                              |                |               |
| <i>D. melanogaster</i> GTGAGTT-----TCGTACACTTAATTAATAGGATCGGCCGTTAATAAAAAGTATGCC---GAACTCGCAG                                     |                |               |
| <i>D. simulans</i> GTGAGTT-----TCGTACACTTAATTAATAGGATCGGCCGTTAATAAAAAGTATGCC---GAACTCGCAG                                         |                |               |
| <i>D. yakuba</i> GTGAGTT-----TCGTACACTTAATTAAT <b>TGGGA</b> CGGCCGTTAATAAAAAGTATGCC---GAACTCGCAG                                  |                |               |
| <i>D. ananassae</i> GT <b>AATCT</b> ----- <b>T</b> TGAATAATTAT <b>CTGTGAGTTGT</b> GGCATCTAAT <b>GATTGT</b> ----- <b>TATCTTCAG</b> |                |               |
| <i>D. pseudoobscura</i> GT <b>AAGTCCATGAAT</b> TGCAT <b>CCCTTTGAT</b> ----- <b>TATTCTTTAATCTGGAAATCCCTGTGATCCCATAG</b>            |                |               |

**mir-1014**

**# reads:** 3  
**Most abundant read:** AAAAAUCAUUUUCAUUUGCAG  
**Host gene:** [CG2196-RA](#)  
**Intron coordinates:** [chr3R:27579245-27579313\(-\)](#)

|                                                                                                                                   | <u># reads</u> | <u># loci</u> |
|-----------------------------------------------------------------------------------------------------------------------------------|----------------|---------------|
| GUAUAAUGGAAAUAGAUUUUAAUCGCAGGCGCAGUGGUUGAAUAAAAUCAUUUUCAUUUGCAG<br>((((((((((.....)))))))).))))))..<br>.....UAAAAUCAUUUUCAUUUGCAG | 1              | 1             |
| .....AAAAUCAUUUUCAUUUGCAG                                                                                                         | 2              | 1             |
| <br>                                                                                                                              |                |               |
| <i>D. melanogaster</i> GTATAATGGAAATAGATTTTAATCGCAGGCGCGTCAGTGGTTGAATTAAAATTCATTTTCATTTGCAG                                       |                |               |
| <i>D. simulans</i> GTATAATGGAAATAGATTTTAATCG <b>CT</b> GCGCGTCAGTGGTTGAATTAAAATTCATTTTCATTTGCAG                                   |                |               |
| <i>D. yakuba</i> GTATAATGGAAATAGATTTTAATCGCAGGCGCGTCAGTGGTTGAATTAAAATTCATTTTCATTTGCAG                                             |                |               |
| <i>D. ananassae</i> GTATAAT <b>G</b> AAAT <b>T</b> GATTTTAAT <b>ACACG</b> GATCGGAGTGG <b>CAA</b> AATAAAATTCATTTTCATTTGCAG         |                |               |
| <i>D. pseudoobscura</i> GT <b>CA</b> ATGGAAATAGATTTTAATCG <b>GGTTTCGTT</b> TGGCGGT <b>G</b> AAATAAAATTCATTTTCATTT <b>CA</b> G     |                |               |





**Table S3.** Quantification of signals from RNA blots of Figure 2c and 2d. Signals were first normalized to that of the loading control (U6), then to that of the control dsRNA (GFP). When signal was below detection (b.d.), the upper bound of the value, based on the normalized detection limit, is shown for relevant lanes.

Fig. 2c Quantification

|                         | dsRNA |               |                |                   |                |             |                         |                |                |
|-------------------------|-------|---------------|----------------|-------------------|----------------|-------------|-------------------------|----------------|----------------|
|                         | GFP   | <i>drosha</i> | <i>dicer-1</i> | <i>loquacious</i> | <i>dicer-2</i> | <i>r2d2</i> | <i>drosha + dicer-1</i> | <i>Idbr(1)</i> | <i>Idbr(2)</i> |
| pre- <i>let-7</i> miRNA | 1.0   | 0.03          | 3.54           | 0.90              | 0.51           | 0.60        | 0.14                    | 0.48           | 0.91           |
| <i>let-7</i> miRNA      | 1.0   | 0.45          | 1.36           | 1.58              | 1.37           | 2.02        | 0.23                    | 1.90           | 3.80           |
| pre-miR-1003 probe1     | 1.0   | 0.12          | 0.57           | 0.65              | 0.32           | 0.29        | 0.35                    | 0.06           | 0.08           |
| pre-miR-1003 lariat     | b.d.  | b.d.          | b.d.           | b.d.              | b.d.           | b.d.        | b.d.                    | 0.36           | 0.57           |
| pre-miR-1003 probe2     | 1.0   | 0.10          | 0.51           | 0.68              | 0.36           | 0.32        | 0.31                    | 0.03           | 0.03           |
| miR-1003                | 1.0   | 0.92          | 0.08           | 0.09              | 0.81           | 0.31        | 0.10                    | b.d. (<.04)    | b.d. (<.04)    |

Fig. 2d Quantification

|                         | dsRNA |               |                |                   |                |             |                         |                |
|-------------------------|-------|---------------|----------------|-------------------|----------------|-------------|-------------------------|----------------|
|                         | GFP   | <i>drosha</i> | <i>dicer-1</i> | <i>loquacious</i> | <i>dicer-2</i> | <i>r2d2</i> | <i>drosha + dicer-1</i> | <i>Idbr(1)</i> |
| pre- <i>let-7</i> miRNA | 1.0   | b.d. (<.05)   | 4.56           | 2.19              | 1.15           | 1.51        | 0.15                    | 1.05           |
| <i>let-7</i> miRNA      | 1.0   | 0.17          | 0.85           | 1.61              | 1.21           | 0.41        | 0.21                    | 0.91           |
| pre-miR-1006 probe1     | 1.0   | 0.36          | 1.37           | 1.33              | 0.92           | 0.73        | 1.15                    | 0.46           |
| pre-miR-1006 lariat     | b.d.  | b.d.          | b.d.           | b.d.              | b.d.           | b.d.        | b.d.                    | 0.18           |
| pre-miR-1006 probe2     | 1.0   | 0.34          | 1.37           | 1.41              | 1.10           | 0.86        | 1.28                    | 0.53           |
| miR-1006                | 1.0   | 0.73          | 0.14           | 0.15              | 0.56           | 0.31        | 0.37                    | 0.37           |

Table S4

>pCJ19 (pMT-puro miR-1006)
actagtAACACGAATACATCCAGTCCGGTGGCCCGGTGCCTGCAGATGATGCTCCGTGTGGATGAGTATCGATTTGCCCTTTGTGGGAGTGCAGCGAATCAGCACTCTGATCCGATCTTGTTCGAC
CCGTGTCAACTCCAGGTGAGTTTGAATTTGAATCGCTAAATTTGGTACAAATTTAAATTCGATTTCTTATTATCATAGGTGCAATACCAGTGTATCTTTTGCCTGTGGGTGCTGACCTTCAAT
CCCTCGTGGCCGCAAGATGAATAAGTTTCAGCGTGCATCCCATCCTGGCTGATATCCTCAGCGATTTGTGCCAAGGAGAGGTGACACGCATTTATCCTCGCGCTCTTCCCAATCTGATCGAGAA
GCCGAGGATTCATCGGTGGCCCAAGGACCATAGCATCGCCATGTTCCAGTGAAGTGTGAAAGCAGTATCCATCCTGGAGCAGCGTCCGTTTCGACGACGAGGACATTAACCGCCGACGTAGAGT
ACCTGAGCAGAAAGCTCCAGAACTTCGGTCAAGACTTGAGCTCCTTTTGTAGTACGCCACAGAGGTGCGCAGCGTCCGTTTGGAAATGGTTCGCTGTCACAACTCGGCCGAGTTCGGCCGAG
AATGCCACGCGCTTAAACGAAAAGAACTACGAGTTGCTGCGCATCCTCGTCCACCTCCTGGAACCTCAAAGATGCCATCATCTTTCCGTCGCTGCTTCGACATCGGGGAGTATGTGCGCCA
CTATCCCCGGCGAAGCgagggcgc

>pCJ20 (pMT-puro miR-1003)
actagtATAAAGCCGATAAGCTGCGGAAATCGAAAAGACCGAGCGTGAACGACTGCAACAGCAGGAAACGCGAGGATGAGATGCGCGAACTGGCCCTCAAGCTGCGCAGAAAGTGGGTATCTGGA
TGTGGTTGGCTCTGGCGTCTCTCACATTTACATATTCACAGGCGCGGTGAGCTGCGTCAAAATATGGAACGCGCTCGATGGAAGGCTCTCGGACAGCGATGCCAATCTGTGGCATCGGAA
AGCCAGTGGCAAAGTCTGACGCGTTCGACGAGTTCGAGAGTCTGAGCGGTGCCACCAGCGAAACACAGCACAGCAGCAGGAGCAGCAGCGAAACGGAAGGAGGAGACGCAC
AAGGACGgagggcgc

>pCJ24 (pMT-puro let-7)
actagtGACAAATGGCGGAGTAAAGGATAAAAAGTCCAGTCAAAAACCGGATTAATACGAAATAAATAACTACTAAAATAACTAAATAGAAGATCAACAGCGATCCATTAACAAACTATAACAATA
ATATGTAATAGAAAACCATCGATAAATAAATCGTAAACTTAAATTAACCTGATATCCAAACGTCATATAAATAACAACCTCAAAACGTCATAATAAGAAAACCTGATATGGTATAACAACCTCAAGTT
TAAGTTTGAATAACACAAAGTAATTTACTTAAATATCATCTTATGATATTTTATTTAAACATTCAAATGTAACCTTCAAAGCATTTTAAATATGATTTCTCCGATATTTTCTTCTTCTG
TTTGCATATCGTTTCAACAAAAACCGAACCAATGATATCCAGAAGATCCTTTAAATACCAAAACCACTAGCAAAAAGGACTACCAAGGACCTTTTCTCTGCGCAATTTAGGTAGTAG
GTTGTATAGTAAATAACACATACATACTATACAATGTGCTAGCTTTCTTTGGTTGACTACAAAGCGCATTTGATAAAAAGAAATCCAAATCGAACTGCACCACTTAATAAAACCAATCCCCGCA
TACAAAAGTTGTTGTTGCAACAAATTTTGTATTTGGACAAACAAAGAAAGTGTCTGAGCCAACTATTGTTAAATATCATACGAATGCCAAAGTATGTAATGCAACCGGGCATATGTAATAAT
TGGCATTGTGACATGTGCAAAATGTTTGTATGGCTGATTCCTGAGACCTAACTTGTGACTTTTAAATACCAGTTTCAAAAGTTTGTATCTCCGGTATTTGGACGCAAACTTGTCTGgagggcgc

>pCJ30 (p2032 miR-1003)
ggtaccATAAAGCCGATAAGCTGCGGAAATCGAAAAGACCGAGCGTGAACGACTGCAACAGCAGGAAACGCGAGGATGAGATGCGCGAACTGGCCCTCAAGCTGCGCAGAAAGTGGGTATCTGGA
TGTGGTTGGCTCTGGCGTCTCTCACATTTACATATTCACAGGCGCGGTGAGCTGCGTCAAAATATGGAACGCGCTCGATGGAAGGCTCTCGGACAGCGATGCCAATCTGTGGCATCGGAA
AGCCAGTGGCAAAGTCTGACGCGTTCGACGAGTTCGAGAGTCTGAGCGGTGCCACCAGCGAAACACAGCACAGCAGCAGGAGCAGCAGCGAAACGGAAGGAGGAGACGCAC
AAGGACGgagggcgc

>pCJ31 (p2032 miR-1006)
ggtaccAACACGAATACATCCAGTCCGGTGGCCCGGTGCCTGCAGATGATGCTCCGTGTGGATGAGTATCGATTTGCCCTTTGTGGGAGTGCAGCGAATCAGCACTCTGATCCGATCTTGTTCGAC
CCGTGTCAACTCCAGGTGAGTTTGAATTTGAATCGCTAAATTTGGTACAAATTTAAATTCGATTTCTTATTATCATAGGTGCAATACCAGTGTATCTTTTGCCTGTGGGTGCTGACCTTCAAT
CCCTCGTGGCCGCAAGATGAATAAGTTTCAGCGTGCATCCCATCCTGGCTGATATCCTCAGCGATTTGTGCCAAGGAGAAAGTGAACACGCATTTATCCTCGCGTCTTCCGCAATCTGATCGAGAA
GCCGAGGATTCATCGGTGGCCCAAGGACCATAGCATCGCCATGTTCCAGTGAAGTGTGAAAGCAGCTATCCATCCTGGAGCAGCGTCCGTTTCGACGACGAGGACATTAACCGCCGACGTAGAGT
ACCTGAGCAGAAAGCTCCAGAATTCGGTGAAGACTTGAGCTCCTTTGATGAGTACGCCACAGAGGTGCGCAGCGTCCGTTTGGAAATGGTTCGCTGTCACAACTCGGCCGAGTTCGGCCGAG
AATGCCACGCGCTTAAACGAAAAGAACTACGAGTTGCTGCGCATCCTCGTCCACCTCCTGGAACCTCAAAGATGCCATCATCTTTCCGTCGCTGCTTCGACATCGGGGAGTATGTGCGCCA
CTATCCCCGGCGAAGCgagggcgc

>pCJ32 (p2032 Let-7)
ggtaccGACAAATGGCGGAGTAAAGGATAAAAAGTCCAGTCAAAAACCGGATTAATACGAAATAAATAACTACTAAAATAACTAAATAGAAGATCAACAGCGATCCATTAACAAACTATAACAATA
ATATGTAATAGAAAACCATCGATAAATAAATCGTAAACTTAAATTAACCTGATATCCAAACGTCATATAAATAACAACCTCAAAACGTCATAATAAGAAAACCTGATATGGTATAACAACCTCAAGTT
TAAGTTTGAATAACACAAAGTAATTTACTTAAATATCATCTTATGATATTTTATTTAAACATTCAAATGTAACCTTCAAAGCATTTTAAATATGATTTCTCCGATATTTTCTTCTTCTG
TTTGCATATCGTTTCAACAAAAACCGAACCAATGATATCCAGAAGATCCTTTAAATACCAAAACCACTAGCAAAAAGGACTACCAAGGACCTTTTCTCTGCGCAATTTAGGTAGTAG
GTTGTATAGTAAATAACACATACATACTATACAATGTGCTAGCTTTCTTTGGTTGACTACAAAGCGCATTTGATAAAAAGAAATCCAAATCGAACTGCACCACTTAATAAAACCAATCCCCGCA
TACAAAAGTTGTTGTTGCAACAAATTTTGTATTTGGACAAACAAAGAAAGTGTCTGAGCCAACTATTGTTAAATATCATACGAATGCCAAAGTATGTAATGCAACCGGGCATATGTAATAAT
TGGCATTGTGACATGTGCAAAATGTTTGTATGGCTGATTCCTGAGACCTAACTTGTGACTTTTAAATACCAGTTTCAAAAGTTTGTATCTCCGGTATTTGGACGCAAACTTGTCTGgagggcgc

>Drosha dsRNA
GGTCAACAAGCCGGTTATAAGCCGTGTTGCTACGCGTTGACCAATTTGGACAGGAATAAATCCGATTTGCCCGAGTGCCTGATGCGGAGACTGGAATCTCACATCCAGCAATCGTGCACCTTTG
CGATTTGTCTCATCTCAGCTTAAGTACGCTGGAATCCAGAGTACCAAGAGCGGTGGCGAGAGTACGTTAAGTACCGTCTATGATGGCCAAATGTCGAAGCCCTCTTCAAGGATAAGCGCAAG
CTAGGAGAAAGGAGCAACGCTCTTCAGGAGATGCGAACTCAGGGGCGCATGAAACGAAATATCAGACTGGCGATCAGCTCGAATCGGATCGGATTCATCTCGCACCGCAATTTGTCGACGTTGTG
TGCCATGTTGATTTCTGTTCTAACTGGTCACTTCGCTTTCACAAGTCTGCTGGACCTGCTAGAGGAGAGTATCGGGTACCGCTTTAAATAACGTTACTTCTCAATTTGGCGTGCAGCATCCCT
CATACAGGAAACTACGAACTCCGATCACGCCGTAATTCGCTGACTAATTCGCGAATTCGTCAGCCGGAGTACGGAGATCGCAAGATCCATTTACATGAACACAGCAAGCGGGGTATC
AACACATTAGTGACATTATGT

>Dicer-1 dsRNA
CTACTGGCCACCGCTACGAGCGGAACAGATTTATTTGCTGGGCCATCGAAGTTCCAAGGAGTTTATAGCCCTCAAGCTGCTCCAGGAGCTGTGCGCTCGAGCACGCCGACATGGTCTGTCTCAG
TGTCTATCTCAGTTGCGAGTTTGGCACCGAGACCGAATGCTCCATCTACACGATCTCACCACCTTGACTGACCTGCGGGTGGCAGGAGCAGCCGATATGCAAAATCCCTTTGATCATT
GCTGGACGACTATCAGCTTTCCATCCTACGCGCAGAGGATTTCTTTATCTGCTCGAACTCGCAGAGCTGCTGTGAGCAGCGTCAAGTCTGATGCTGGAAGATTTGTCATGACAGCGCGTT
TATCAGAGATAAGCCCTGTGTTGTCAGAAATCACATTTGCGAGCGCCACCGGCGGACAGGCAAGCTTTGCTGGAATTCGCTGAGCAGCGCCGATGTCGAGTGTGAGCTGACGAACTGAGCGC
CATGCTGGCCACCTGGAGCAGAGTGTGCTTTGCCAGATCGAGACGCGCAGTATGTTGTCACCGTGTGCTTACTGTTCCGACCGCACGAATACATCGTACAGTGCGCCCTTCGAGATGG
ACGAACTG

>Loquacious dsRNA
ATGACACAGGAGAATTTCCACGCGTCCAGCTTTGCCGAGCAGCTACAGAACCTCCACATCCAGCCGAGCAGCGGTCCCCCAATCTGTCCAGACGGGATTTGCTCCAGCGGGCACTATAATAA
CCTGTGTCGCTGGGCAATGGAATGCGCTCAGTGTGATCCGGTGAAGGTTGCTCCGTTGGGGCAGCCGATGTAAGCTCAAGAGGAGAAAGATATCCGCCAGGTTGCGCAGCTGTCTCAGC
CAGGTGAGTGCAGCTGTGATGTTGTTGATCTGCTTTGGCGGGCGGATCGGGCTTACAAGTGGAGTCCGCTTATGGCGTAATATTGCCAGCAGCAGGGCC

>Dicer-2 dsRNA
AAAAGTTCAACGCGAAGAGCAAGGCTAAGATGAAAGTTATTTTGTATCCGGAGCTAGCTTTCAATTTTAACTTTCTGGGGATTTATGGTCTAAGTTGATCTTCTCCTACCAGCATTTTAAACCGCA
TGTACTTCTCTTCCACGAGAGGCTTACGTAAGCGATTTAATACGATTTTAAACCTCCATCTGCTGCTTTTAAATGGAATGATTCATGACGCGCAAGCACTAGAAATTTGATTTGCTGCTAAAG
CGAAATGTCGACCCCTTTGGCAATGTCATACCAACTGAGGATATCGAGGAGCCGAAATCCCTTTTAAAGCAGTATGCCCAAACTCCATTTGAGGCGTCCGTTGAGGCGCTTCTGAAATAACAGAAAT
CGAAAATCCCTGGCAAAATGATATGAGCAGCGTTGATCTGTCGCGAAATCTTTTGTAGTACGATACCCGTAGAGCTGGACTACTATCATTTTACGTTGGTAAATGATGTGAGATGAATGAGA
TGATTTTGAAGATAAGGAATACTGGGCAAAAATCAGT

>R2D2 dsRNA
TGCTGCCCGCATACACGCTTGTGAAAGGATTCGACTGTGGGTGATCTGGATGAGGAACTGACTAACTCAACCGGGACATGGTGAAGGAGTGTGCTGACTACTGCTCCGCGCGAGATGCCA
CTGCCCTGCAATTTGAGGTAGTGCAGCAAGCCGCGCACCCGAGGCGCCGGAATTCGTGGCTGTGCTCCGTTGGCCCTCCATAGTACGCTACGGAAGTCCGCAAAAAGGAGGATGCCCTGACGG
AGCCGCAATTTGAATGCTGGCTTTTACTCCAGCAATTCGCAAAATTTGCGTCCGATCAAATGCAAGTAGCGAGCACAAAGCAAAATGAAAGTTGTTGATATGGAAGAATCTATGAGGAAATTTGG
AGGATTTGCGAGAAAAGAAATTTAC

>CG7942 [1] (Debranching enzyme) dsRNA
GTGGCGAGCTGGTAGCACCAGTGTGACCATATTCATTGGCGGCAACCATGAGGCTCCAAATTTACCTGCGAGGACTCCCATACGCGCGGTTGGGTGGCTCCAAATTTTACTACCTTGGTTATGCC
GGCTGCTGATTAACCGTGTTCGGAATAGAGGGAATCTTCAAGGTTGACTTTTTGGCGGCGCATACGAAATCCCTTTCGAGCAGTATGCCCAAACTCCATTTGAGGCGTCCGTTGAGGAGTGTGAGT
TGTGCGGCGACTAGAAGTCTTTCGCTGAAACAAATTTCCGGCGAGTTGATATTTCTGCTCCACGACTGGCCACCGGCACTATGATAACGAAACAAAGCGCAACTGCTCCGCAAGAAAC
CATTTTTTGTCTGAGACATGGAAGGCGGAAGCTGGTATGAGCAGCCACTGAGGAGTACTGAAAGCGGTCCAAACCGGCTACTGTTTGTGCTCCATTTGCATTGCAAGTTTGGCGCTTTGGT
CGCAAACTCACAGCAGAAAGCTAGGATGCTGAAAT

>CG7942 [2] (Debranching enzyme)
GCACAGTGAAGATGAAGACGAGAAAGGAGGAAAGTAAAGAAAGCTGCTCCCTGACTCCACCATCAAATCTGTTCCGTTGACCAAGTTTCTGGCTCTCGCAAACTGCTGCCAGTCTGCTGCTG
TTCTCCAGTGGTAGAGTACCCAGTCCCACTCGAAGCCACTCCGCTGGAATACGACGAGTGGTGGTCCATCTTGACAGTACAACTCACTTGAATTTAGTGAAGGAGATTTATTA
TTACCTGCCCGGAAAAGGCGGAGAGTTTACAGAGCGATCAAACTTTACCCCACTGAAGAAAGAACTAGAAGCAGTACCGCAAAAGTTTTCAGAACTTCAAGTCCCGAGAACTTTGAGCGCA
CAGTCCGACTTTGATCCCGCGGACGATCTGATTTAAGCACATGTTTGTGGATCAACCAAGGTTCAACTAAACCCCGAGCAATACGTTTGTGCCACTCTGGGATATGACGATCCGCTG
TGCTTATTTTGTGGCAATGCTAGAGTCTGAAAT

## Table S4

>GFP dsRNA  
GATCACATGGTCCCTGCTGGAGTTCGTGACCGCCGCGGGATCACTCTCGGCATGGACGAGCTGTACAAGTAAAGCGGCGGACTCTAGATCATAAATCAGCCATACCAATTTGTAGAGGTTTTA  
CTTGCTTTAAAAAACCTCCACACCTCCCCGTAACCTG

>UTR insert CG11094  
actagtTGATAAATTTTCATTAAGTACGAGTAAACGAATACTACTTTGCCCGGATATTTATTATTGTTTCAGCATCACATATTAGCTTAATGCTTCGGTGAATTCGCGCAATTTAACTTTTATAACT  
TAGAGTTGAGTAACTTAGAGTTTTATGGAGCAAAACCTCTGTAATAAATCGAATTTATCGGTAAACTAAAGCGGACTTGGACTATCTTCAATCAACAAGCCAAATATGTCGATGTGTGACAGC  
CGTTCTACCGGTGAGCTTTCTTCAATCAACATTACCCCGTGTGAGATGTCTGGCCCTCAATGTTAATAATCTCAATCTACAATCAACATTTCTTTCTTCAATCAACAATCCGCAAAACGGATCT  
AATGcgggcgcg

>UTR insert CG11094-mutant  
actagtTGATAAATTTTCATTAAGTACGAGTAAACGAATACTACTTTGCCCGGATATTTATTATTGTTTCAGCATCACATATTAGCTTAATGCTTCGGTGAATTCGCGCAGTGAACCTTTTATAACT  
TAGAGTTGAGTAACTTAGAGTTTTATGGAGCAAAACCTCTGTAATAAATCGCAGTGATCGGTAAACTAAAGCGGACTTGGACTATCTTCAATCAACAAGCCAAATATGTCGATGTGTGACAGC  
CGTTCTACCGGTGAGCTTTCTTCAATCAACATTACCCCGTGTGAGATGTCTGGCCCTCAATGTTAATAATCTCAATCTACAATCAACATTTCTTTCTTCAATCAACAATCCGCAAAACGGATCT  
AATGcgggcgcg

>UTR insert CG1849  
actagtCCTGGAAATCAGACTCCGGCGAAGTTTTATGCTCGGACTCATAAAATCGTGCAGAGTTTGAATCAACAGGCCCTCGATTTTACCAGGATTTTTTACAAATCCAGCAGAAAAACGCA  
AAACTCAAAAACCTCAGCCAAAAAGAAAATACCAAGAAAGCAAACCTTAGTTCAATTTCAATTTCAACACAAAAACAACAACAACAATTTGTACATAGCTAACTAGTTGTAACACTCATAACTTTT  
TTTTTTTTGAGAACCTATTTTTTCGATGGATAATATGCGAATTTAGCTATTTTTAATCATTAGTTTAACTAGTCTAAGCGAGAAAAACAATTTTTTGTCTAGCCATAAGTTTTTAGCGCGCA  
AAAGAGATCTAACACAAAAATCGAATTTGAAACAAAACCAATAAAAAACAAAAATCACACAAAAAgcgccgcg

>UTR insert CG1849-mutant  
actagtCCTGGAAATCAGACTCCGGCGAAGTTTTATGCTCGGACTCATAAAATCGTGCAGAGTTTGAATCAACAGGCCCTCGATTTTACCAGGATTTTTTACAAATCCAGCAGAAAAACGCA  
AAACTCAAAAACCTCAGCCAAAAAGAAAATACCAAGAAAGCAAACCTTAGTTCAATTTCAATTTCAACACAAAAACAACAACAACAATTTGTACATAGCTAACTAGTTGTAACACTCATAACTTTT  
TTTTTTTTGAGAACCTATTTTTTCGATGGATAATATGCGCAGTGAAGCTATTTTTAATCATTAGTTTAACTAGTCTAAGCGAGAAAAACAATTTTTTGTCTAGCCATAAGTTTTTAGCGCGCA  
AAAGAGATCTAACACAAAAATCGCAGTGGAAACAAAACCAATAAAAAACAAAAATCACACAAAAAgcgccgcg

>UTR insert CG5166a  
actagtGACACCAGAAACCCAAAGTCATCATTCCAAGTTAGTTTTCCACCGGCGCAAGGAAAGGGCCGCGCTTCATCCAGCATTCCGATTGTAAACTTACTTAGCATATAATGTGAACCTCGGTTT  
GGAAGGAGCTGATCGCTGATCGCTGATCGAAGCTGCAAGCTGGATGGAAGCTCTTTGCTTGCCTCGCGGAAATGAAAAACGAATGTGAGATTTAGAGAGCTTCAAATTTATTCGTTTCCTTTT  
CGAAATTCGGTAGAACTAAATTAATTTTTGTTTAAATGAAATTTGTTGCCACTTCTCCGCCTCTTCTTACACATTATTCCGAGCATTACAGAAAATGTAATGACATCGATATATAAATGATTG  
TTTTGACGTTTCTCGGAGAAATTTCTTGTAGCTTTACAGGCAGAAGCTAATGTGAGAGCAAGAGCTTGAGTCAGGCTTCTTTGGGTTTTAGTGCCTCCGTTGTCTCCGAATTAATGAAAAAT  
TAAACAAGAACAAATCCGTATTACTTCTTTGCCCGTCATAAAATCGGTTTGGTTATATTTTCTGATGATCTAGAAGCATCTGTTGTGGTCTGTTTTGTTTTGTAAACCTTCAAGTTTCTTAAATGAAG  
cgccgcg

>UTR insert CG5166a-mutant  
actagtGACACCAGAAACCCAAAGTCATCATTCCAAGTTAGTTTTCCACCGGCGCAAGGAAAGGGCCGCGCTTCATCCAGCATTCCGATTGTAAACTTACTTAGCATATAATGTGAACCTCGGTTT  
GGAAGGAGCTGATCGCTGATCGCTGATCGAAGCTGCAAGCTGGATGGAAGCTCTTTGCTTGCCTCGCGGAAATGAAAAACGAATCTCACATTTTAGAGAGCTTCAAATTTATTCGTTTCCTTTT  
CGAAATTCGGTAGAACTAAATTAATTTTTGTTTAAATGAAATTTGTTGCCACTTCTCCGCCTCTTCTTACACATTATTCCGAGCATTACAGAAAATGTAATGACATCGATATATAAATGATTG  
TTTTGACGTTTCTCGGAGAAATTTCTTGTAGCTTTACAGGCAGAAGCTAATGTGAGAGCAAGAGCTTGAGTCAGGCTTCTTTGGGTTTTAGTGCCTCCGTTGTCTCCGAATTAATGAAAAAT  
TAAACAAGAACAAATCCGTATTACTTCTTTGCCCGTCATAAAATCGGTTTGGTTATATTTTCTGATGATCTAGAAGCATCTGTTGTGGTCTGTTTTGTTTTGTAAACCTTCAAGTTTCTTAAATGAAG  
cgccgcg

>UTR insert CG6551  
actagtTGATATCCACCCGATTCAAACCACAGCATCAGCATCCGCATCTATATTTCGCATCAGCAACAGGAAACCTCTTGCCATGCTACCCACACATCTGAGGACACTGATTGTTAGCTCAAGAC  
AACACAACCTGAAATCGAAACGCATTGAATTTAGATCAAATTCGAGCTGGTATCGAATATTAAACCATACAACAAACATAAACAAAAGGCTCCCTAAATGATTTAAATATTGGTCTGGTCCCTTA  
AGATTTAAAAATATCAATTAGTTTTTATGGAAATAGTTAGTTTCAATCGTAATAGGCATTTAAAAACATTTTACCCTAATTGAGTTTTTAAATCTCCAGAGGATTTCAACGCACCAATATTTTG  
TACACAACACACATTTGTTAAATTTAAATTTTCACTCGAATTTCAAGTATTTCTATTTTGCAAAAATTTTGTGTAAATCTCGcgccgcg

>UTR insert CG6551-mutant  
actagtTGATATCCACCCGATTCAAACCACAGCATCAGCATCCGCATCTATATTTCGCATCAGCAACAGGAAACCTCTTGCCATGCTACCCACACATCTGAGGACACTGATTGTTAGCTCAAGAC  
AACACAACCTGAAATCGAAACGCATTGAATTTAGATCAAATTCGAGCTGGTATCGAATATTAAACCATACAACAAACATAAACAAAAGGCTCCCTAAATGATTTAAATATTGGTCTGGTCCCTTA  
AGATTTAAAAATATCAATTAGTTTTTATGGAAATAGTTAGTTTCAATCGTAATAGGCATTTAAAAACATTTTACCCTAATTGAGTTTTTAAATCTCCAGAGGATTTCAACGCACCAATATTTTG  
TACACAACACACATTTGTTAAATTTAAATTTTCACTCGCAGTGAAGTATTTCTATTTTGCAAAAATTTTGTGTAAATCTCGcgccgcg
